# Supplementary material
Source: publisher figshare collection journal article supplement (https://acs.figshare.com/ndownloader/files/15168926)
Supplement: Supplementary file 1 [file 15168926]

# Supporting Information

## **Polyoxometalate-Based Inorganic-Organic Hybrid [Cu(phen)<sub>2</sub>]<sub>2</sub>[( $\alpha$ -Mo<sub>8</sub>O<sub>26</sub>)] : A New Additive to Spiro-OMeTAD for Efficient and Stable Perovskite Solar Cells**

Yayu Dong,<sup>†</sup> Yulin Yang,<sup>\*,†</sup> Lele Qiu,<sup>†</sup> Guohua Dong,<sup>‡</sup> Debin Xia,<sup>†</sup> Xianda Liu,<sup>†</sup>  
Mengru Li,<sup>†</sup> and Ruiqing Fan<sup>\*,†</sup>

<sup>†</sup>MIIT Key Laboratory of Critical Materials Technology for New Energy Conversion  
and Storage School of Chemistry and Chemical Engineering, Harbin Institute of  
Technology, Harbin 150001, P.R. China

E-mail: ylyang@hit.edu.cn; fanruiqing@hit.edu.cn

<sup>‡</sup>College of Chemistry and Chemical Engineering, Qiqihar University, Qiqihar 161006,  
P.R. China

## S1 Experimental Section

*Measurements and Characterizations:* The photocurrent-voltage (*J-V*) plots and impedance spectroscopy (EIS) were conducted at the open air with a CHI660D electrochemical work station and a solar simulator under AM 1.5 G sunlight produced by a 450 W xenon lamp, whose light intensity was adjusted with a standard Si reference cell (Oriel, 1 sun light intensity 100 mW/cm<sup>2</sup>). Active area of solar cells is 0.06 cm<sup>2</sup>. The scan rate of *J-V* plots and frequency of EIS are 20 mV/s and 1-10<sup>5</sup> HZ, respectively. The incident photo to electron efficiency (IPCE) spectra were carried out using the system installed a 300 W xenon lamp to give out the excitation beam. The given light was collected through a 1/4 monochromator (model 74125 Oriel Cornerstone 260, Newport, USA). Fourier transform infrared (FT-IR) spectra were collected on a PerkinElmer Spectrum 100 FT-IR spectrometer with samples prepared as KBr discs. X-ray diffraction (XRD) characteristics were performed using Shimadzu XRD-6000 X-ray Diffraction instrument with Cu-K $\alpha$  radiation. Scan electron microscope (SEM) measurements were conducted by Rili SU 8000HSD Series Hitachi New Generation Cold Field Emission SEM. The AFM analysis were performed by using a Bruker Dimension ICONPT with Co/Cr tips. The given signal was ultimately collected by a lock-in amplifier. UV-vis absorption spectra were recorded by a Shimadzu and SPECORD S600 spectrophotometer. Photoluminescence performance were investigated by steady-state fluorescence spectrometer FLS920. The PL emission intensity spectra were recorded by an FLS 920 luminescence spectrometer. The ESR spectra was measured using an X-band (9.69 GHz) Bruker ER083CS spectrometer at 300 K. Cyclic voltammetry (CV) was obtained using the Gamry electrochemical workstation with Pt plate as working electron, Pt slice as counter electrode, and Ag/AgCl electrode as reference electrode in tetrabutylammonium hexafluorophosphate (Bu<sub>4</sub>NPF<sub>6</sub>, 0.1 M) chlorobenzene solutions at a scan rate of 50 mV/s. The follow energy level calculation method were used to determine the HOMO according to the literature.[1,2]

$$E_{LUMO} = -(E^{Red} + 4.50 + 0.20) \quad (1)$$

$$E_{HOMO} = -(E^{Ox} + 4.50 + 0.20) \quad (2)$$

$$E_{HOMO} = E_g + E_{LUMO} \quad (3)$$

### *Mobility Measurements*

Hole mobility was investigated by the space-charge-limited current (SCLC) method, which can be described by the following equation:

$$J = (9/8) \mu \epsilon_0 \epsilon_r (V^2/d^3)$$

where  $J$  is the current density,  $\mu$  is the hole mobility,  $\epsilon_0$  is the vacuum permittivity ( $8.85 \times 10^{-12}$  F/m),  $\epsilon_r$  is the dielectric constant of the material (normally taken to approach 3 for organic semiconductors),  $V$  is the applied bias, and  $d$  is the film thickness.

### **S2 Single-crystal structure analysis**

The collection of single-crystal X-ray analyses data were performed on a Bruker Apex II CCD equipped with a normal focus at 296K, sealed tube X-ray source (Mo-K $\alpha$  radiation,  $\lambda = 0.71073$  Å) operating at 50 kV and 30 mA. The structures were solved by direct methods and refined by full-matrix least-squares using the SHELXL-2014/7 program package. Anisotropic thermal parameters were used to refine all non-hydrogen atoms. A summary of the crystallographic data and structure determination for CMP is provided in Table S2. Selected bond lengths and angles for **CMP** are given in Table S3 and S4. Distances (Å) and angles (°) of hydrogen bonds for **CMP** are given in Table S5.

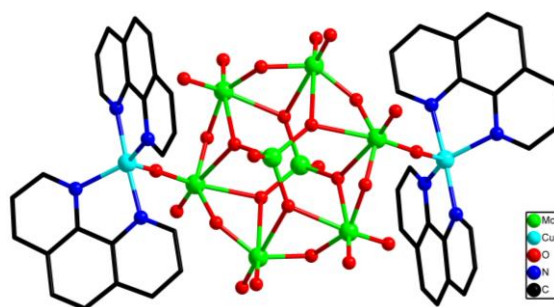

**Fig. S1** The structure of **CMP**

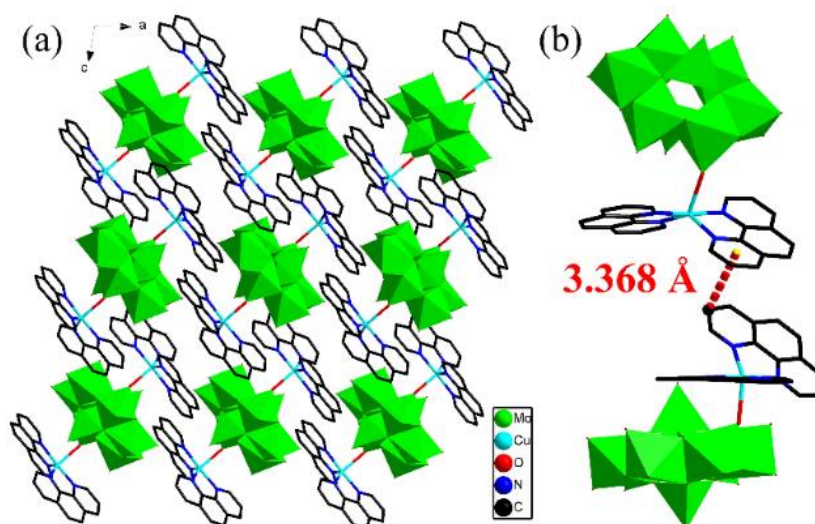

**Fig. S2** (a) The 3D framework of CMP along the b-axis; (b)  $\pi$ - $\pi$  stacking interactions between adjacent clusters

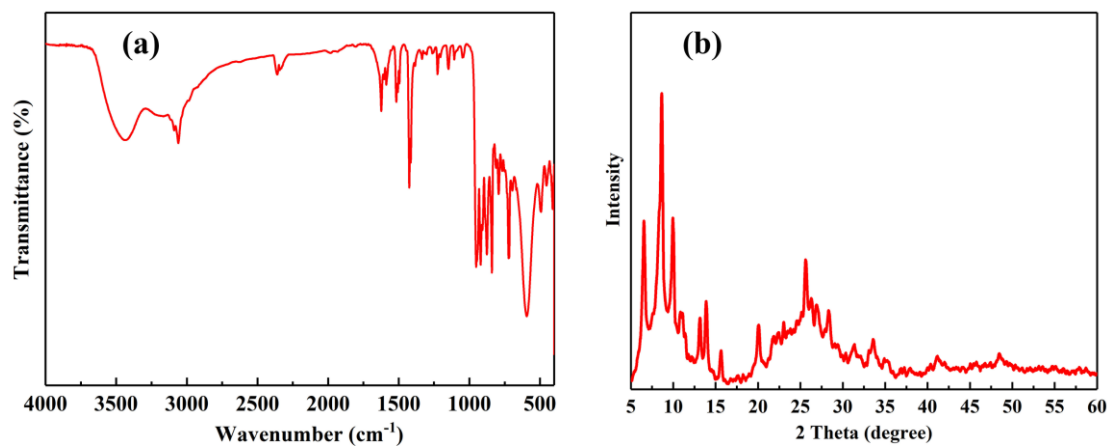

**Fig. S3** (a) The FTIR spectrum of CMP; (b) The XRD pattern of CMP

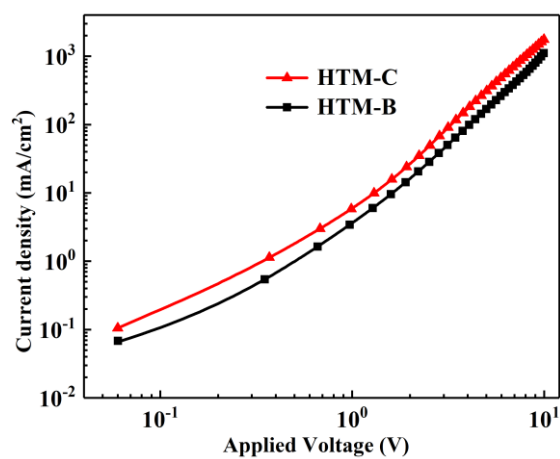

**Fig. S4** The dark J-V curves of HTM-B and HTM-C based hole-only devices.

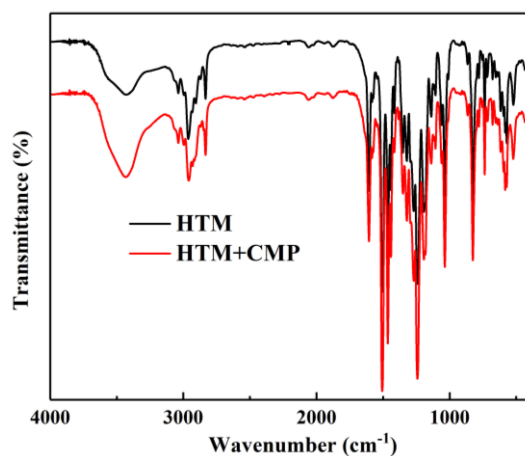

**Fig. S5** The FTIR spectra of HTL doped with or without CMP

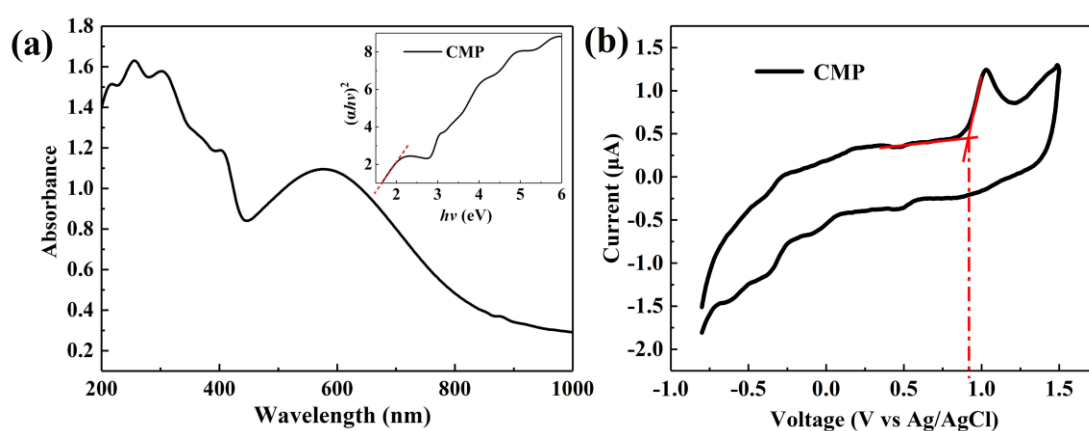

**Fig. S6** The UV-vis spectrum and cyclic voltammetry spectrum of the synthesized heteropolyacid CMP (a) UV-vis spectrum (the Inset is the tauc plot); (b) cyclic voltammetry spectrum

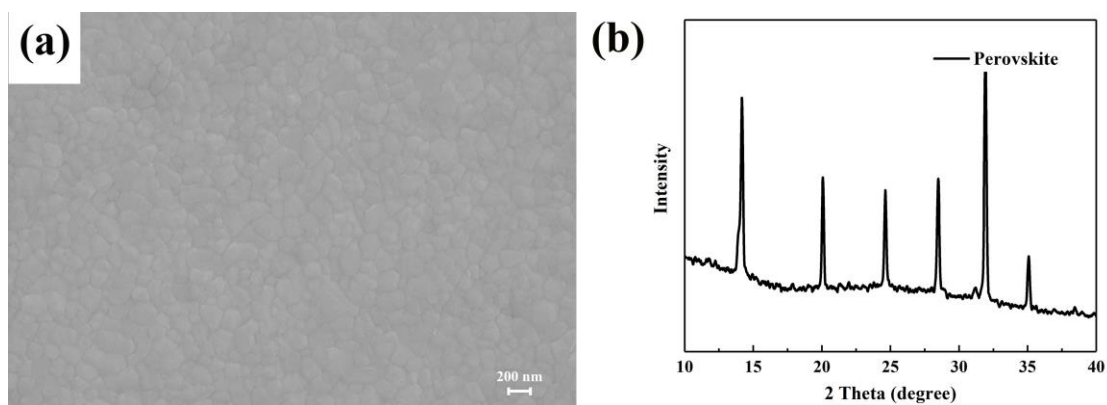

**Fig. S7** (a) The SEM image and (b) XRD pattern of perovskite film

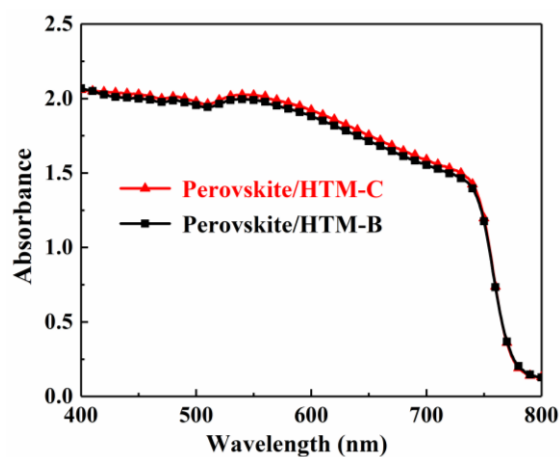

**Fig. S8** The UV-vis absorption spectra of HTM-B and HTM-C

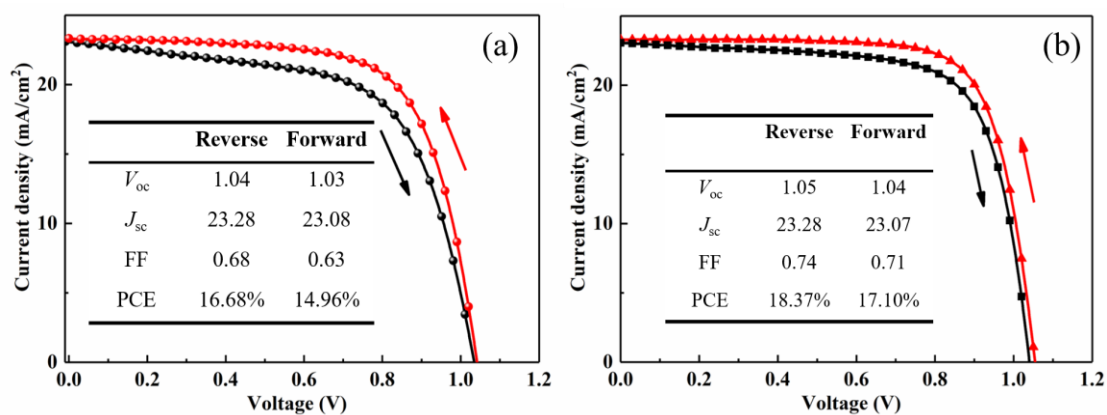

**Fig. S9** The J-V curves of devices (a) HTM-B (b) HTM-C in the forward and reverse scanning directions

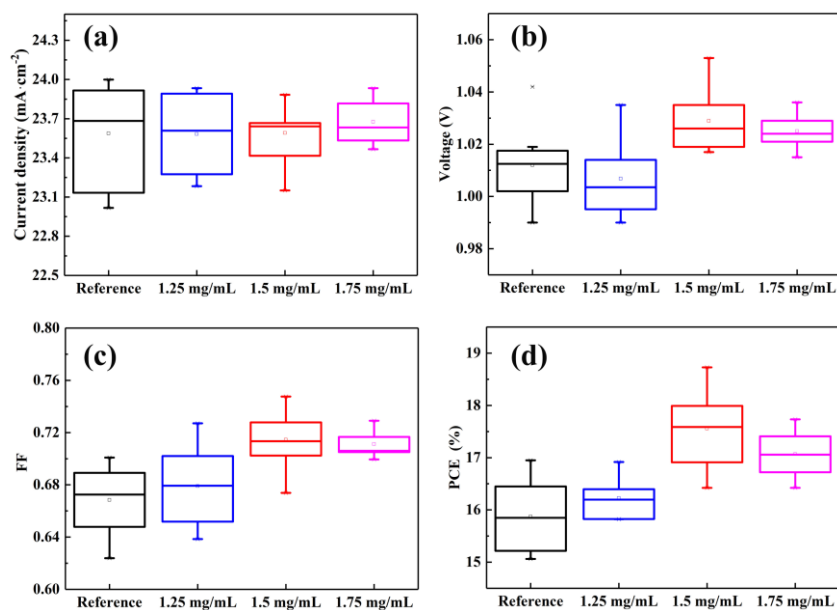

**Fig. S10** Statistical distribution of the (a)  $J_{sc}$  (b)  $V_{oc}$  (c) FF (d) PCEs for PSCs with different concentrations of CMP

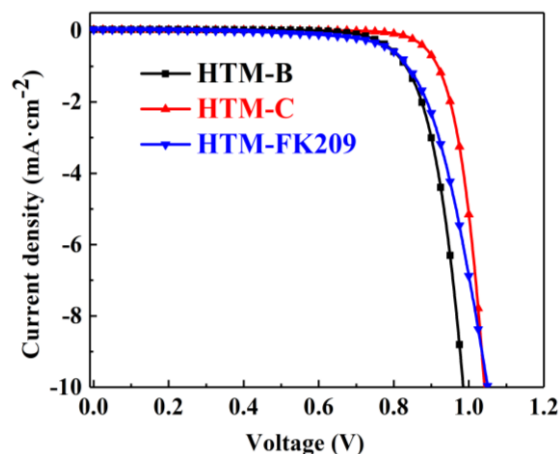

**Fig. S11** The current density-voltage (J-V) curves of the optimal PSCs with different HTMs under dark

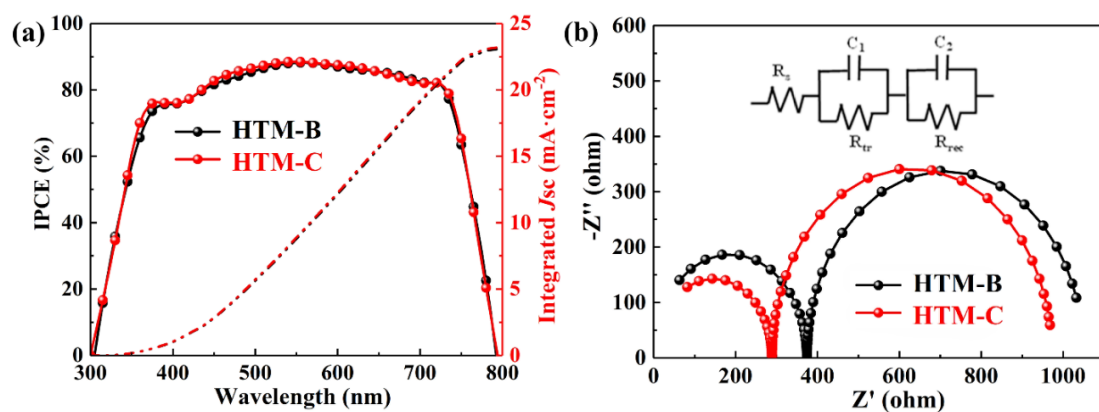

**Fig. S12** (a) incident photo-to-current conversion efficiency spectra; (b) The EIS measurement spectra of the PSCs fabricated with or without CMP. The Inset of Figure d is the equivalent electrical circuits for fitting the EIS data

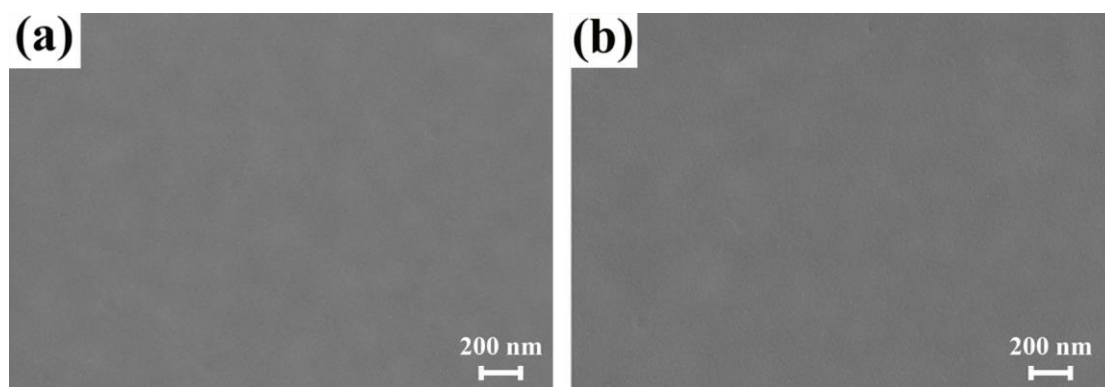

**Fig. S13** The SEM image of HTL film (a) and with CMP (b)

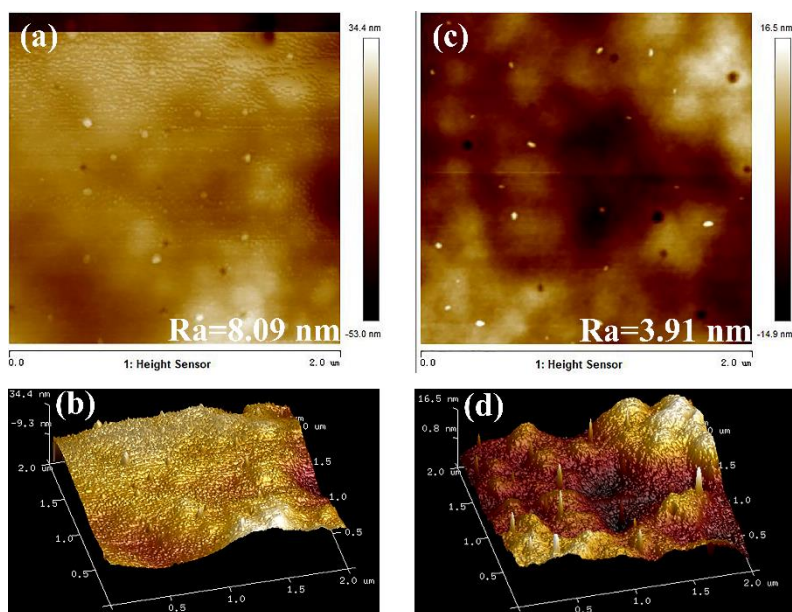

**Fig. S14** Top view AFM images of (a) HTL; (b) 3D AFM images of HTL; (c) HTL with CMP; (d) 3D AFM images of HTL with CMP

**Table S1** Carrier lifetime of corresponding devices with or without different complexes

| Devices            | $\tau_1$ | $\tau_2$ | $A_1\%$ | $A_2\%$ | $\tau(\text{average})$ |
|--------------------|----------|----------|---------|---------|------------------------|
| Perovskite         | 0.81     | 6.07     | 87.19   | 12.81   | 5.49                   |
| Perovskite/HTL     | 0.71     | 6.87     | 73.53   | 26.47   | 3.57                   |
| Perovskite/HTL-CMP | 0.79     | 5.40     | 86.80   | 13.20   | 3.14                   |

**Table S2** The Crystallographic data of CMP

| Compound                                  | CMP                                                                                            |
|-------------------------------------------|------------------------------------------------------------------------------------------------|
| Empirical formula                         | C <sub>48</sub> H <sub>32</sub> Cu <sub>2</sub> Mo <sub>8</sub> N <sub>8</sub> O <sub>26</sub> |
| Formula weight                            | 2031.44                                                                                        |
| Temperature (K)                           | 296(2)                                                                                         |
| Crystal system                            | Monoclinic                                                                                     |
| Space group                               | P21/c                                                                                          |
| a (Å)                                     | 10.5018(6)                                                                                     |
| b (Å)                                     | 12.0953(7)                                                                                     |
| c (Å)                                     | 21.9996(13)                                                                                    |
| $\beta$ (°)                               | 97.989(1)                                                                                      |
| Volume (Å <sup>3</sup> )                  | 2767.3(3)                                                                                      |
| Z                                         | 2                                                                                              |
| Calculated density (Mg / m <sup>3</sup> ) | 2.438                                                                                          |



|                                               |                                             |
|-----------------------------------------------|---------------------------------------------|
| Absorption coefficient (mm <sup>-1</sup> )    | 2.597                                       |
| F(000)                                        | 1956                                        |
| Crystal size (mm <sup>3</sup> )               | 0.11 x 0.12 x 0.13                          |
|                                               | -12<=h<=12                                  |
| Limiting indices                              | -13<=k<=14                                  |
|                                               | -26<=l<=21                                  |
| Reflections collected                         | 13937                                       |
| Independent reflection                        | [R(int) = 0.028]                            |
| Max. and min. transmission                    | 0.752 and 0.721                             |
| Refinement method                             | Full-matrix least-squares on F <sup>2</sup> |
| Data / restraints / parameters                | 4925 / 1 / 415                              |
| Goodness-of-fit on F <sup>2</sup>             | 1.03                                        |
| Final R indices [I > 2sigma(I)] <sup>ab</sup> | R1 = 0.0250, wR2 = 0.601                    |
| R indices (all data)                          | R1 = 0.0328, wR2 = 0.627                    |

$$^aR1 = \Sigma||F_o| - |F_c|| / \Sigma|F_o|; wR2 = \Sigma[w(F_o^2 - F_c^2)^2] / \Sigma[w(F_o^2)^2]^{1/2}$$

**Table S3** Selected bond lengths for CMP (Å)

|          |          |          |          |
|----------|----------|----------|----------|
| Mo1-O4   | 1.928(2) | Mo2-O5_a | 2.410(2) |
| Mo1-O6   | 2.367(3) | Mo3-O5   | 1.785(3) |
| Mo1-O14  | 1.687(3) | Mo3-O6   | 1.790(3) |
| Mo1-O15  | 1.698(2) | Mo3-O9   | 1.705(2) |
| Mo1-O1_a | 1.925(2) | Mo3-O12  | 1.772(3) |
| Mo1-O5_a | 2.343(2) | Mo4-O1   | 1.894(2) |
| Mo2-O2   | 1.895(2) | Mo4-O2   | 1.907(2) |
| Mo2-O4   | 1.888(2) | Mo4-O3   | 1.683(3) |
| Mo2-O10  | 1.689(3) | Mo4-O7   | 1.725(3) |
| Mo2-O11  | 1.695(3) | Mo4-O12  | 2.440(3) |
| Mo4-O6_a | 2.389(3) | Cu1-N2   | 2.094(4) |
| Cu1-O7   | 2.192(2) | Cu1-N3   | 1.961(3) |
| Cu1-N1   | 1.972(3) | Cu1-N4   | 2.051(3) |

**Table S4** Selected bond angles (°) for CMP

|              |            |             |            |
|--------------|------------|-------------|------------|
| O4-Mo1-O6    | 81.69(9)   | O6-Mo2-O5   | 108.29(13) |
| O4-Mo1-O14   | 97.60(14)  | O6-Mo3-O12  | 109.69(13) |
| O4-Mo1-O15   | 101.52(11) | O9-Mo3-O12  | 110.69(12) |
| O1_a-Mo1-O4  | 147.14(10) | O1-Mo4-O2   | 144.05(10) |
| O4-Mo1-O5_a  | 72.78(9)   | O1-Mo4-O3   | 100.54(13) |
| O6-Mo1-O14   | 90.33(13)  | O1-Mo4-O7   | 102.31(11) |
| O6-Mo1-O15   | 165.02(12) | O1-Mo4-O12  | 78.83(11)  |
| O1_a-Mo1-O6  | 71.98(9)   | O1-Mo4-O6_a | 71.94(10)  |
| O5_a-Mo1-O6  | 73.60(10)  | O2-Mo4-O3   | 102.09(13) |
| O14-Mo1-O15  | 103.61(14) | O2-Mo4-O7   | 98.88(10)  |
| O1_a-Mo1-O14 | 101.78(14) | O2-Mo4-O12  | 73.09(10)  |
| O5_a-Mo1-O14 | 162.11(14) | O2-Mo4-O6_a | 79.89(10)  |

|               |            |              |            |
|---------------|------------|--------------|------------|
| O1_a-Mo1-O15  | 99.40(11)  | O3-Mo4-O7    | 103.96(13) |
| O5_a-Mo1-O15  | 93.23(12)  | O3-Mo4-O12   | 91.36(11)  |
| O1_a-Mo1-O5_a | 81.03(10)  | O3-Mo4-O6_a  | 166.53(13) |
| O2-Mo2-O4     | 139.59(10) | O7-Mo4-O12   | 164.04(10) |
| O2-Mo2-O10    | 102.00(12) | O6_a-Mo4-O7  | 88.77(11)  |
| O2-Mo2-O11    | 102.22(12) | O6_a-Mo4-O12 | 76.37(9)   |
| O2-Mo2-O5_a   | 79.39(9)   | O7-Cu1-N1    | 87.11(11)  |
| O4-Mo2-O10    | 100.04(12) | O7-Cu1-N2    | 94.32(11)  |
| O4-Mo2-O11    | 104.73(11) | O7-Cu1-N3    | 90.69(11)  |
| O4-Mo2-O5_a   | 71.81(10)  | O7-Cu1-N4    | 129.53(11) |
| O10-Mo2-O11   | 103.99(14) | N1-Cu1-N2    | 82.08(11)  |
| O5_a-Mo2-O10  | 166.59(13) | N1-Cu1-N3    | 176.84(12) |
| O5_a-Mo2-O11  | 88.60(12)  | N1-Cu1-N4    | 97.64(12)  |
| O5-Mo3-O6     | 110.45(12) | N2-Cu1-N3    | 100.36(11) |
| O5-Mo3-O9     | 108.42(13) | N2-Cu1-N4    | 136.15(12) |
| O5-Mo3-O12    | 109.28(12) | N3-Cu1-N4    | 82.02(12)  |

**Table S5** Distances and angles [ $\text{\AA}$ ,  $^\circ$ ] of hydrogen bonds for CMP

| D-H $\cdots$ A        | d(D-H) | d(H $\cdots$ A) | d(D $\cdots$ A) | $\angle$ D-H $\cdots$ A |
|-----------------------|--------|-----------------|-----------------|-------------------------|
| C2-H2A $\cdots$ O9    | 0.93   | 2.56            | 3.161(5)        | 123                     |
| C2-H2A $\cdots$ O11   | 0.93   | 2.59            | 3.075(5)        | 113                     |
| C3-H3A $\cdots$ O9    | 0.93   | 2.59            | 3.181(5)        | 122                     |
| C7-H7A $\cdots$ O10   | 0.93   | 2.56            | 3.282(5)        | 135                     |
| C14-H14A $\cdots$ O9  | 0.93   | 2.51            | 3.072(5)        | 119                     |
| C19-H19A $\cdots$ O1  | 0.93   | 2.5             | 3.415(5)        | 166                     |
| C22-H22A $\cdots$ O15 | 0.93   | 2.6             | 3.519(5)        | 170                     |
| C24-H24A $\cdots$ O11 | 0.93   | 2.42            | 3.080(5)        | 127                     |

- (1) Lv, S.; Wang, Z. Y.; Gu, X.; Zhang, C.; Jian, Y. G.; Lin, H. Coordination polymer based perovskite device: matched energy levels and photocurrent enhancement in the absence or presence of methanol. *CrystEngComm*. **2017**, *19*, 7021–7030.
- (2) Lee, D. Y.; Shinde, D. V.; Yoon, S. J.; Cho, K. N.; Lee, W.; Shrestha, N. K.; Han, S. H. Cu-Based Metal–Organic Frameworks for Photovoltaic Application. *J. Phys. Chem. C*, **2014**, *118*, 16328.
